# Supplementary material for: Catalytic hydrolysis of methyl mercaptan and methyl thioether on hydroxyl-modified ZrO 2 : a density functional theory study
Source: Royal Society of Chemistry journal article supplement (doi:10.1039/d4ra03801k), 2024-01-01
Supplement: d4ra03801k1.pdf [file d4ra03801k1.pdf]

## Supplementary materials

### Figures

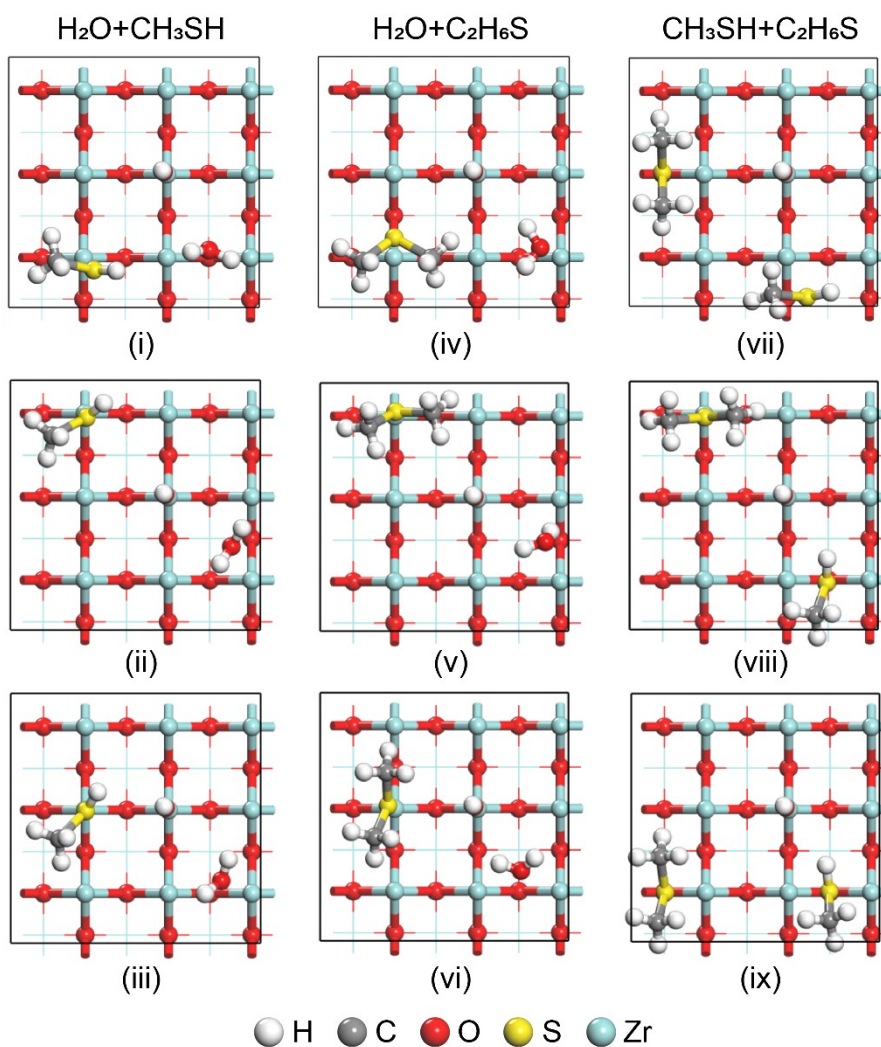

**Fig. S1.** Optimised adsorption configuration for two-gas molecules adsorption over hydroxyl-modified ZrO<sub>2</sub>

### Tables

**Table S1** Adsorption energy of two-gas molecules adsorption over hydroxyl-modified

| ZrO <sub>2</sub>      |                               |
|-----------------------|-------------------------------|
| Adsorptive geometries | Adsorption energy<br>(kJ/mol) |
| (i)                   | -219.78                       |
| (ii)                  | -172.14                       |

---

|        |         |
|--------|---------|
| (iii)  | -185.03 |
| (iv)   | -173.37 |
| (v)    | -134.25 |
| (vi)   | -151.72 |
| (vii)  | -148.04 |
| (viii) | -118.22 |
| (ix)   | -129.46 |

---
